# Supplementary material for: Bimetallic core–shell nanoparticle arrays at liquid–liquid interface for the degradation and monitoring of dye pollutants in situ by surface-enhanced Raman spectroscopy
Source: Royal Society of Chemistry journal article supplement (doi:10.1039/d3ay00001j), 2023-01-01
Supplement: d3ay00001j1.pdf [file d3ay00001j1.pdf]

## Supporting Information

*for*

### **Bimetallic Core-Shell Nanoparticle Arrays at Liquid-Liquid Interface for In Situ Degrading and Monitoring Dye Pollutants by Surface-enhanced Raman Spectroscopy**

Yujiao Wei<sup>1#</sup>, Jinhu Guo<sup>2#</sup>, Cheng Qu<sup>2</sup>, Yuchuang Geng<sup>2</sup>, Wuji Zhang<sup>1</sup>, Mengke Su<sup>2,3\*</sup>, Shengnan He<sup>1\*</sup>, and Honglin Liu<sup>2</sup>

<sup>1</sup>Institutes of Physical Science and Information Technology, Anhui University, Hefei 230601, P. R. China

<sup>2</sup>China Light Industry Key Laboratory of Meat Microbial Control and Utilization, School of Food and Biological Engineering, Engineering Research Center of Bio-process, Ministry of Education, Hefei University of Technology, Hefei 230009, P. R. China

<sup>3</sup>State Key Laboratory of Tea Plant Biology and Utilization, Anhui Agricultural University, 130 Changjiang West Road, Hefei, Anhui 230036, China

\*Corresponding Author E-mail: [heshengnan@ahu.edu.cn](mailto:heshengnan@ahu.edu.cn), [sumengke555@163.com](mailto:sumengke555@163.com)

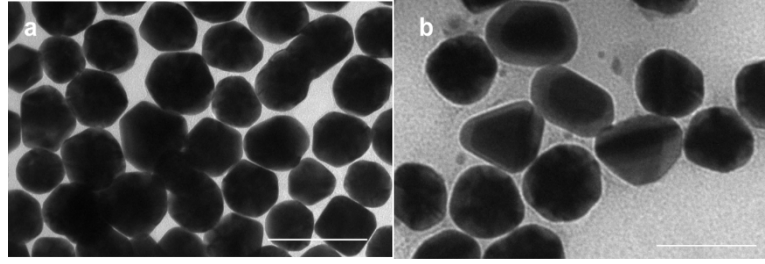

**Figure S1.** The transmission electron microscope (TEM) image of Au<sub>50</sub>NPs(a) and Au<sub>50</sub>@Ag<sub>10</sub>NPs(b).

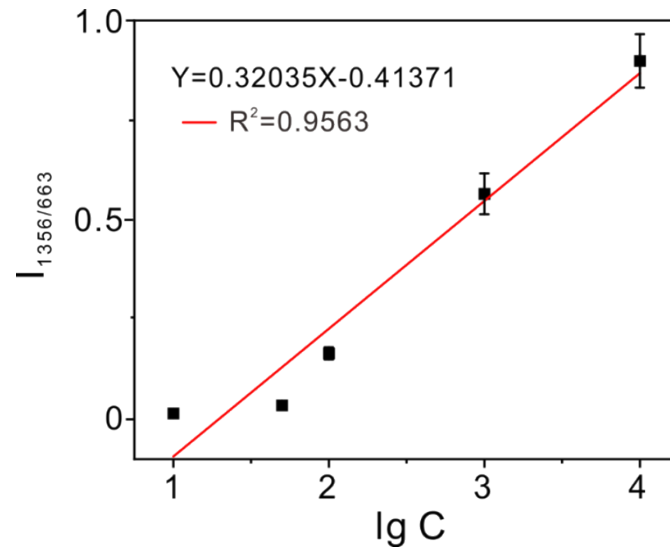

**Figure S2.** Statistical analysis of the Raman signal at 1356 cm<sup>-1</sup> for CV.

**Table S1.** Experimentally observed Raman bands of MB with the corresponding assignments.

| Vibration modes           | Characteristic peaks(cm <sup>-1</sup> ) |
|---------------------------|-----------------------------------------|
| Skeletal deformation      | 588                                     |
| -                         | 766                                     |
| -                         | 858                                     |
| -                         | 881                                     |
| In-plane bending          | 1037                                    |
| -                         | 1322                                    |
| In-plane ring deformation | 1392                                    |
| Ring-stretching           | 1617                                    |

**Table S2.** Experimentally observed Raman bands of CV with the corresponding assignments.

| Vibration modes             | Characteristic peaks(cm <sup>-1</sup> ) |
|-----------------------------|-----------------------------------------|
| Ring-bend                   | 721                                     |
| Ring skeletal vibration     | 910                                     |
| Phenyl stretching           | 1356                                    |
| Phenyl stretching           | 1386                                    |
| Ring stretching and bending | 1584                                    |
| Ring stretching             | 1617                                    |
